# Supplementary material for: Elucidating the electronic structure of CuWO4 thin films for enhanced photoelectrochemical water splitting
Source: Royal Society of Chemistry journal article supplement (doi:10.1039/c8ta12070f), 2019-01-01
Supplement: c8ta12070f1.pdf [file c8ta12070f1.pdf]

## Supplemental Information for

### Elucidating the Electronic Structure of CuWO<sub>4</sub> Thin Films for Enhanced Photoelectrochemical Water Splitting

C. M. Tian<sup>1</sup>, M. Jiang<sup>2</sup>, D. Tang<sup>1</sup>, L. Qiao<sup>2</sup>, H. Y. Xiao<sup>2</sup>, F. E. Oropeza<sup>3</sup>, J. P. Hofmann<sup>3</sup>, E. J. M. Hensen<sup>3</sup>, A. Tadich<sup>4,5</sup>, W. Li<sup>6</sup>, D. C. Qi<sup>7</sup>, and K. H. L. Zhang<sup>1\*</sup>

<sup>1</sup>*State Key Laboratory of Physical Chemistry of Solid Surfaces, College of Chemistry and Chemical Engineering, Xiamen University, Xiamen 361005, P.R. China.*

<sup>2</sup>*School of Physics, University of Electronic Science and Technology of China, Chengdu 610054, China*

<sup>3</sup>*Laboratory of Inorganic Materials Chemistry, Department of Chemical Engineering and Chemistry, Eindhoven University of Technology, P. O. Box 513, 5600MB Eindhoven, The Netherlands*

<sup>4</sup>*Australian Synchrotron, 800 Blackburn Road, Clayton, Victoria 3168, Australia*

<sup>5</sup>*Department of Chemistry and Physics, La Trobe University, Melbourne, Victoria 3086, Australia*

<sup>6</sup>*Department of Materials Science & Metallurgy, University of Cambridge, 27 Charles Babbage Road, Cambridge, CB3 0FS, United Kingdom*

<sup>7</sup>*School of Chemistry, Physics and Mechanical Engineering, Queensland University of Technology, Brisbane, Queensland 4001, Australia*

\*Email: kelvinzhang@xmu.edu.cn

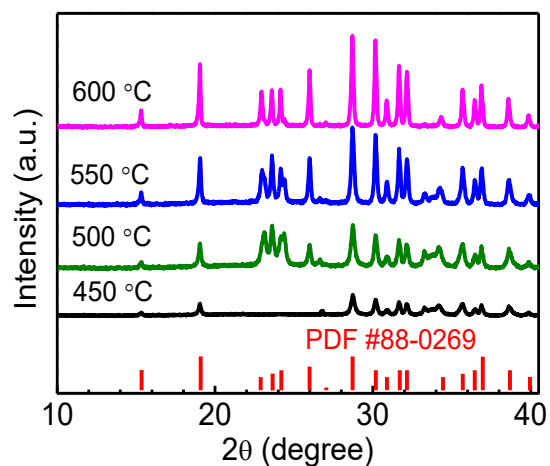

**Figure S1.** XRD patterns of the  $\text{CuWO}_4$  thin films annealed at different temperatures, indicating that the crystalline phase of  $\text{CuWO}_4$  starts to form at temperatures above 450 °C.

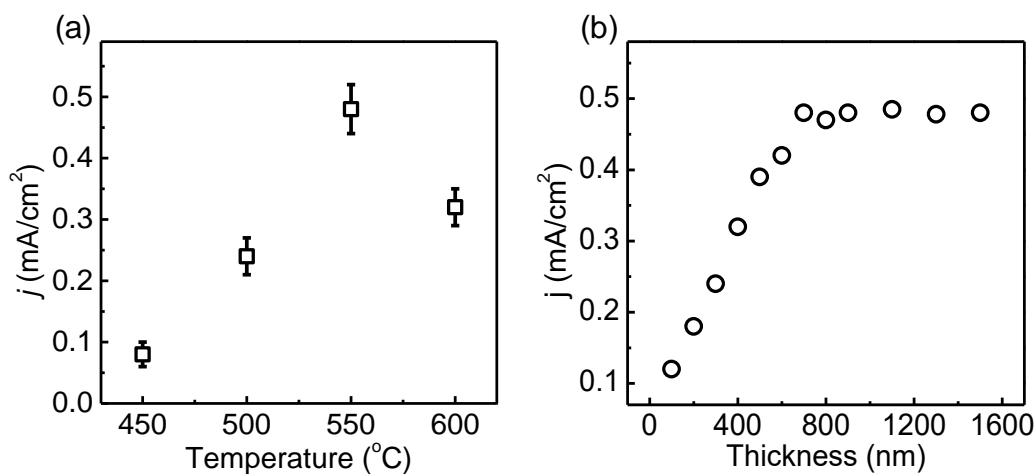

**Figure S2.** (a) Photocurrent densities of  $\text{CuWO}_4$  photoelectrodes prepared by at different annealing temperatures, and (b) different film thickness; the photocurrent density obtained under simulated AM 1.5G at an applied bias of +1.23 V vs. RHE.

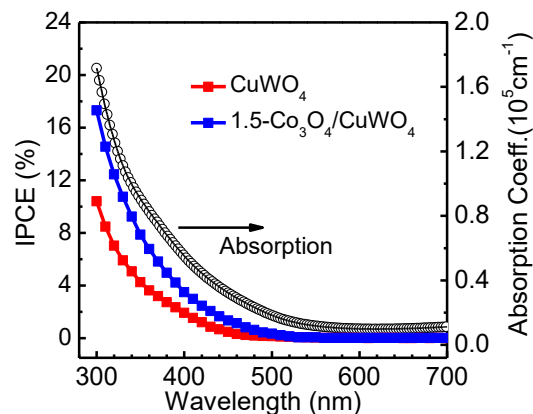

**Figure S3:** Incident photon-to-current conversion efficiencies (IPCE) spectra of  $\text{CuWO}_4$  and 1.5 nm  $\text{Co}_3\text{O}_4$  modified  $\text{CuWO}_4$  at an applied bias of +1.23 V vs. RHE. The low IPCE in range of 400 nm - 500 nm is likely due to 1) low absorption coefficient of  $\text{CuWO}_4$  because both of the valence band edge and conduction band edge are of Cu 3d character, i.e., optical excitation is partially forbidden; 2) hole state excited with low photon energy having a low mobility, similar to the case of  $\text{Fe}_2\text{O}_3$ .<sup>1,2</sup>

**Table S1.** The fitted  $R_{\text{ct}}$  values of  $\text{Co}_3\text{O}_4/\text{CuWO}_4$  heterojunctions with different  $\text{Co}_3\text{O}_4$  thickness

|                               | $\text{CuWO}_4$ | 1.5- $\text{Co}_3\text{O}_4/\text{CuWO}_4$ | 3- $\text{Co}_3\text{O}_4/\text{CuWO}_4$ |
|-------------------------------|-----------------|--------------------------------------------|------------------------------------------|
| $R_{\text{ct}}$ (K $\Omega$ ) | 2.8             | 1.6                                        | 1.1                                      |

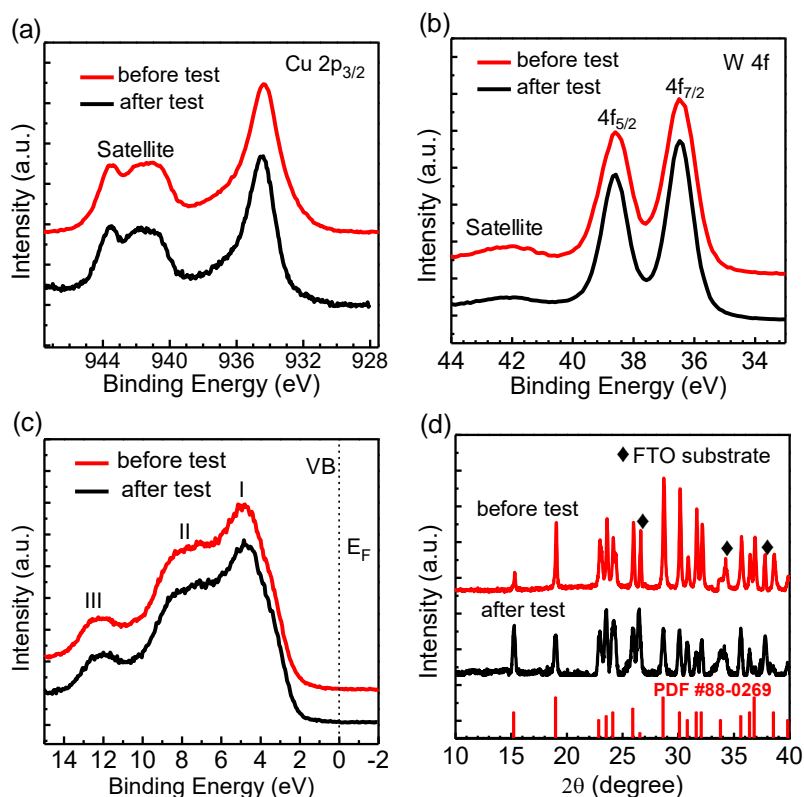

**Figure S4.** Comparisons of XPS spectra of the  $\text{CuWO}_4$  photoanode before and after stability test (a)  $\text{Cu } 2p_{3/2}$ , (b)  $\text{W } 4f$  and (c) valence band (VB); the  $\text{Cu } 2p$ ,  $\text{W } 4f$  and VB spectra show very similar lineshapes before and after 10 hour stability test, indicating there is no much change of the electronic structures. (d) Comparison of XRD patterns for the  $\text{CuWO}_4$  photoanode before and after stability test, showing pure phase of  $\text{CuWO}_4$  before and after test.

Reference:

1. Lin, Y.; Zhou, S.; Sheehan, S. W.; Wang, D. Nanonet-Based Hematite Heteronanostructures for Efficient Solar Water Splitting. *J. Am. Chem. Soc.* **2011**, *133*, 2398–2401.
2. Kim, D. W.; Riha, S. C.; Demarco, E. J.; Martinson, A. B. F.; Farha, O. K.; Hupp, J. T. Greenlighting Photoelectrochemical Oxidation of Water by Iron Oxide. *ACS Nano* **2014**, *12*, 12199-12207.
